# Supplementary material
Source: Springer Nature journal article supplement (https://www.springermedizin.de/resource/supplementary/12943_2010_766_MOESM4_ESM.pdf/9554772)

# Plexin-B1

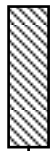

**Wild type**

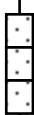

**Intrinsic GAP activity**

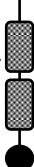

**PDZ-RhoGEF  
/LARG**

**Rho**

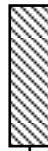

**Mutant**

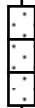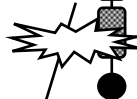

**R-ras**

**R-ras**

**Increased motility and  
invasion in tumor cells**

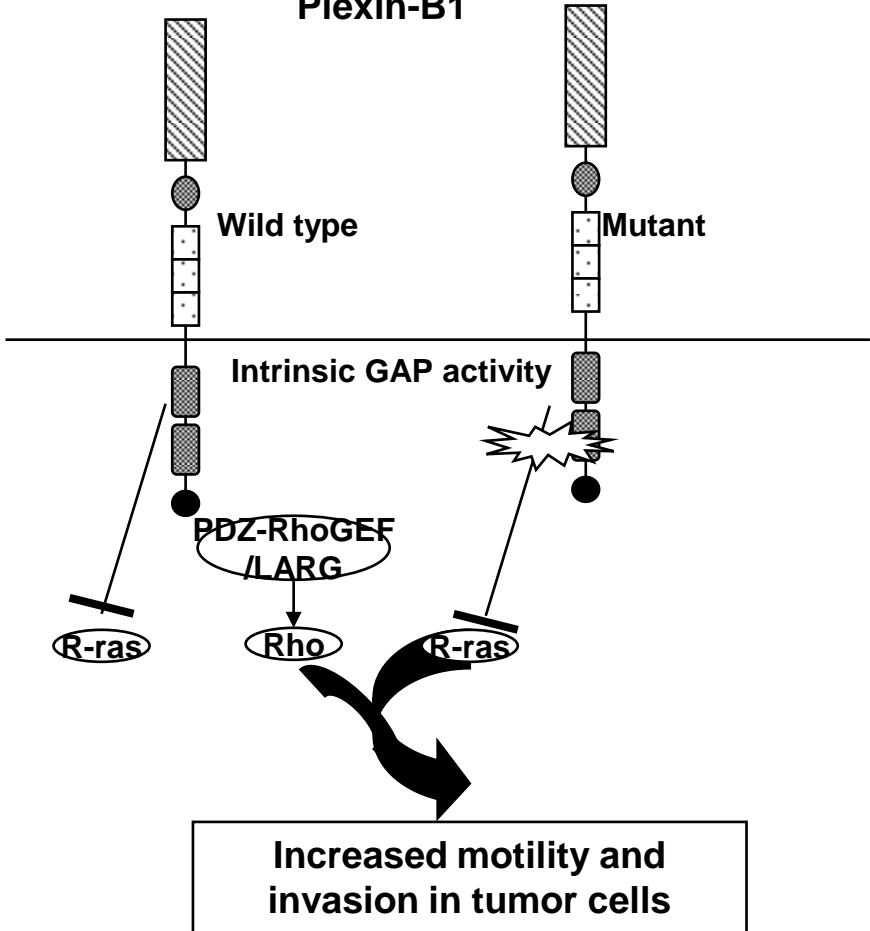

Supplement: MOESM4 [file 9554772]
